# Supplementary material for: Psychological impact of polygamous marriage on women and children: a systematic review and meta-analysis
Source: Springer Nature journal article supplement (doi:10.1186/s12884-021-04301-7), 2021-12-13
Supplement: MOESM1 [file 19954942]

Supplementary file 1. Search strategies

| Database  | Search                                                                                                                                                                                                                                                                                                                                                                                                                                                                                                | Number of studies |
|-----------|-------------------------------------------------------------------------------------------------------------------------------------------------------------------------------------------------------------------------------------------------------------------------------------------------------------------------------------------------------------------------------------------------------------------------------------------------------------------------------------------------------|-------------------|
| Ebscohost | psychological AND polygamy AND ( women or female or woman or females ) OR ( children or adolescents or youth or child or teenager ) AND marriage AND depress* AND anxiety                                                                                                                                                                                                                                                                                                                             | 1,511             |
| Pubmed    | (polygamy[Text Word] OR polygyny[Text Word] OR polygynous[Text Word]) AND (((("Women"[Mesh]) OR ((women[Text Word] OR woman[Text Word] OR wife[Text Word] OR wives[Text Word]))) OR (((("Child"[Mesh]) OR "Adolescent"[Mesh])) OR ((minors[Text Word] OR kid[Text Word] OR child*[Text Word] OR adolescen*[Text Word] OR youth*[Text Word] OR teen*[Text Word] OR pubescen*[Text Word])))))) AND (("Psychological Phenomena"[Mesh]) OR (psychological*[Text Word] OR psychopathological*[Text Word])) | 121               |
| Scopus    | psychological AND polygamy AND ( women OR female OR woman OR females ) OR ( children OR adolescents OR youth OR child OR teenager ) AND marriage AND depress* OR anxiety AND impact                                                                                                                                                                                                                                                                                                                   | 155               |
| ProQuest  | Polygamy OR marriage AND women AND children<br>Polygamy AND women AND children<br>Psychological impact AND Polygamy AND women AND children                                                                                                                                                                                                                                                                                                                                                            | 5730<br>152<br>85 |
