# Supplementary material for: Psychological impact of polygamous marriage on women and children: a systematic review and meta-analysis
Source: Springer Nature journal article supplement (doi:10.1186/s12884-021-04301-7), 2021-12-13
Supplement: MOESM2 [file 19954942]

## Supplementary file 2. Quality assessment based on Joanna Briggs Institute Critical Appraisal Checklist

| Criteria (Yes/No/Unclear/NA)                                               | Elbedour 2003 | Al-Krenawi 2000 | Bamgbade 2014 | Abbo 2008 | Al-Sherbiny 2005 | Chaleby 1985 | Darakeh 2006 | Hamdan 2008 | Kianpoor 2006 | Maziak 2002 | Ozkan 2006 | Patil 2008 | Al-Krenawi 2001 | Al-Krenawi 2006 | Al-Krenawi 2008 | Al-Krenawi 2011 | Yilmaz 2018 | Al-Krenawi 2002 | Ozer 2013 | Farahmand 2019 | Daoud 2014 | Al-Krenawi 2012 | Hamdan 2009 |
|----------------------------------------------------------------------------|---------------|-----------------|---------------|-----------|------------------|--------------|--------------|-------------|---------------|-------------|------------|------------|-----------------|-----------------|-----------------|-----------------|-------------|-----------------|-----------|----------------|------------|-----------------|-------------|
| 1 Were the criteria for inclusion in the sample clearly defined?           | 1             | 1               | 1             | 1         | 1                | 0            | 1            | 1           | 1             | 1           | 1          | 1          | 1               | 1               | 1               | 1               | 1           | 0               | 1         | 1              | 1          | 1               | 1           |
| 2 Were the study subjects and the setting described in detail?             | 1             | 1               | 1             | 1         | 1                | 0            | 1            | 1           | 1             | 1           | 1          | 1          | 1               | 1               | 1               | 1               | 1           | 1               | 1         | 1              | 1          | 1               | 1           |
| 3 Was the exposure measured in a valid and reliable way?                   | 1             | 1               | 1             | 1         | 1                | 1            | 1            | 1           | 1             | 1           | 1          | 1          | 1               | 1               | 1               | 1               | 1           | 0               | 1         | 1              | 1          | 1               | 1           |
| 4 Were objective, standard criteria used for measurement of the condition? | 1             | 1               | 1             | 1         | 1                | 1            | 1            | 1           | 0             | 1           | 1          | 0          | 1               | 1               | 1               | 1               | 1           | 1               | 1         | 1              | 1          | 1               | 1           |
| 5 Were confounding factors identified?                                     | 0             | 1               | 1             | 1         | 1                | 1            | 1            | 1           | 1             | 1           | 1          | 1          | 1               | 1               | 1               | 1               | 1           | 1               | 1         | 1              | 1          | 1               | 1           |
| 6 Were strategies to deal with confounding factors stated?                 | 0             | 1               | 1             | 1         | 1                | 0            | 1            | 1           | 0             | 1           | 1          | 1          | 1               | 0               | 1               | 1               | 1           | 1               | 0         | 1              | 0          | 1               | 1           |
| 7 Were the outcomes measured in a valid and reliable way?                  | 1             | 1               | 1             | 1         | 1                | 1            | 1            | 1           | 1             | 1           | 1          | 1          | 1               | 1               | 1               | 1               | 1           | 1               | 1         | 1              | 1          | 1               | 1           |
| 8 Was appropriate statistical analysis used?                               | 1             | 1               | 1             | 1         | 1                | 1            | 1            | 1           | 1             | 1           | 1          | 1          | 1               | 1               | 1               | 1               | 1           | 1               | 1         | 1              | 1          | 1               | 1           |
| <b>Total quality score</b>                                                 | 6             | 8               | 8             | 8         | 8                | 5            | 8            | 8           | 6             | 8           | 8          | 7          | 8               | 7               | 8               | 8               | 8           | 6               | 7         | 8              | 7          | 8               | 8           |
| <b>Percentage</b>                                                          | 75.00         | 100.00          | 100.00        | 100.00    | 100.00           | 62.50        | 100.00       | 100.00      | 75.00         | 100.00      | 100.00     | 87.50      | 100.00          | 87.50           | 100.00          | 100.00          | 100.00      | 75.00           | 87.50     | 100.00         | 87.50      | 100.00          | 100.00      |
| <b>Risk of Bias: Rater I</b>                                               | low           | low             | low           | low       | low              | mod          | low          | low         | low           | low         | low        | low        | low             | low             | low             | low             | low         | low             | low       | low            | low        | low             | low         |
| <b>Risk of Bias: Rater II</b>                                              | low           | low             | low           | low       | low              | mod          | low          | low         | low           | low         | low        | low        | low             | low             | low             | low             | low         | low             | low       | low            | low        | low             | low         |
| <b>Overall appraisal</b>                                                   | good          | good            | good          | good      | good             | poor         | good         | good        | good          | good        | good       | good       | good            | good            | good            | good            | good        | good            | good      | good           | good       | good            | good        |

| JBI Quality Assessment Tool for cohort studies                                                             |                 |
|------------------------------------------------------------------------------------------------------------|-----------------|
| Criteria (Yes/No/Unclear/NA)                                                                               | Al-Krenawi 2006 |
| Were the two groups similar and recruited from the same population?                                        | 1               |
| Were the exposures measured similarly to assign people to both exposed and unexposed groups?               | 1               |
| Was the exposure measured in a valid and reliable way?                                                     | 1               |
| Were confounding factors identified?                                                                       | 0               |
| Were the study subjects and the setting described in detail?                                               | 1               |
| Were strategies to deal with confounding factors stated?                                                   | 0               |
| Were the groups/participants free of the outcome at the start of the study (or at the moment of exposure)? | 1               |
| Were the outcomes measured in a valid and reliable way?                                                    | 1               |
| Was the follow up time reported and sufficient to be long enough for outcomes to occur?                    | 0               |
| Was follow up complete, and if not, were the reasons to loss to follow up described and explored?          | 1               |
| Were strategies to address incomplete follow up utilized?                                                  | 1               |
| <b>Total quality score</b>                                                                                 | 8               |
| <b>Percentage</b>                                                                                          | 72.73           |
| <b>Risk of Bias: Rater I</b>                                                                               | Low             |
| <b>Risk of Bias: Rater II</b>                                                                              | Low             |
| <b>Overall appraisal</b>                                                                                   | Good            |
